# Supplementary material for: A miRNA signature in endothelial cell-derived extracellular vesicles in tumor-bearing mice
Source: PubMed Central journal article supplement (PMC6856062; doi:10.1038/s41598-019-52466-1), 2019-11-14

Title: A miRNA signature in endothelial cell-derived extracellular vesicles in tumor-bearing mice

Authors: James V. McCann <sup>1</sup>, Amber Liu <sup>2</sup>, Luca Musante <sup>3</sup>, Uta Erdbrugger <sup>3</sup>, Joanne Lannigan <sup>4</sup>, and Andrew C. Dudley <sup>2,5</sup>

Affiliations:

<sup>1</sup> Department of Cell Biology & Physiology, University of North Carolina at Chapel Hill, Chapel Hill, NC 27599, USA

<sup>2</sup> Department of Microbiology, Immunology, and Cancer Biology, The University of Virginia, Charlottesville, VA 22908, USA

<sup>3</sup> Department of Medicine, Division of Nephrology, The University of Virginia, Charlottesville, VA 22908, USA

<sup>4</sup> Flow Cytometry Core, The University of Virginia, Charlottesville, VA 22908, USA

<sup>5</sup> Emily Couric Cancer Center, The University of Virginia

Correspondence:

Dr. Andrew C. Dudley  
Dept. of Microbiology, Immunology, and Cancer Cell Biology  
The University of Virginia  
Charlottesville, VA 22908  
Tel: (434) 924-7766  
Email: [acd2g@virginia.edu](mailto:acd2g@virginia.edu)

Key words: exosomes, extracellular vesicles, endothelial cells, tumor microenvironment, cancer, angiogenesis, miRNA

**THERE ARE NO CONFLICTS OF INTEREST TO DISCLOSE**

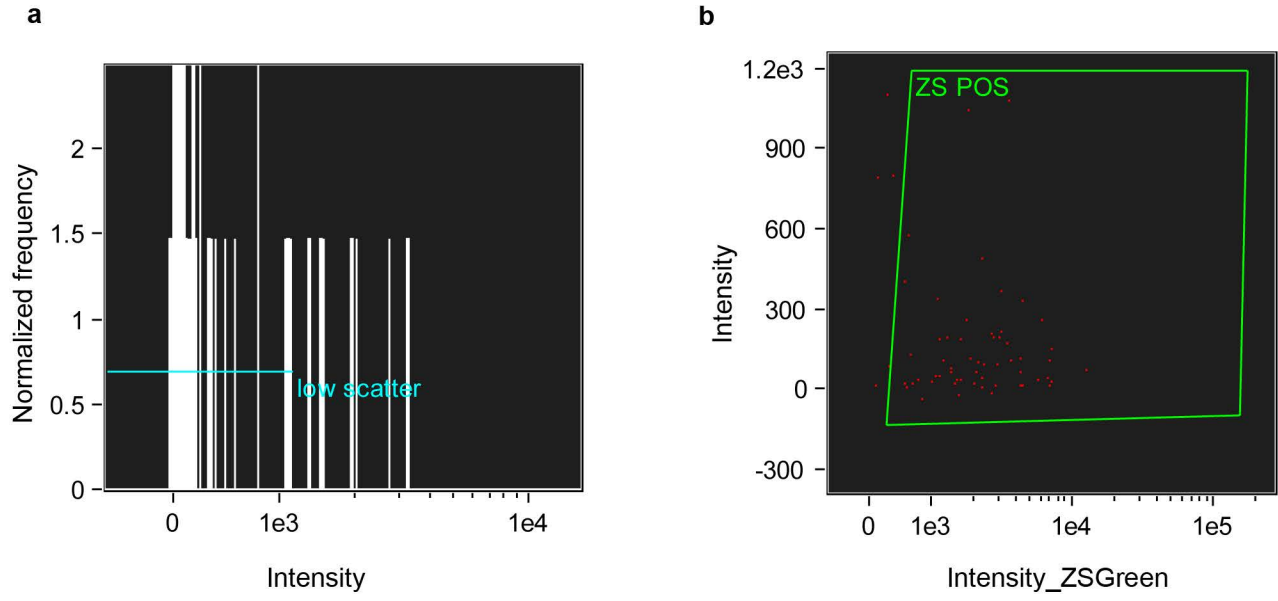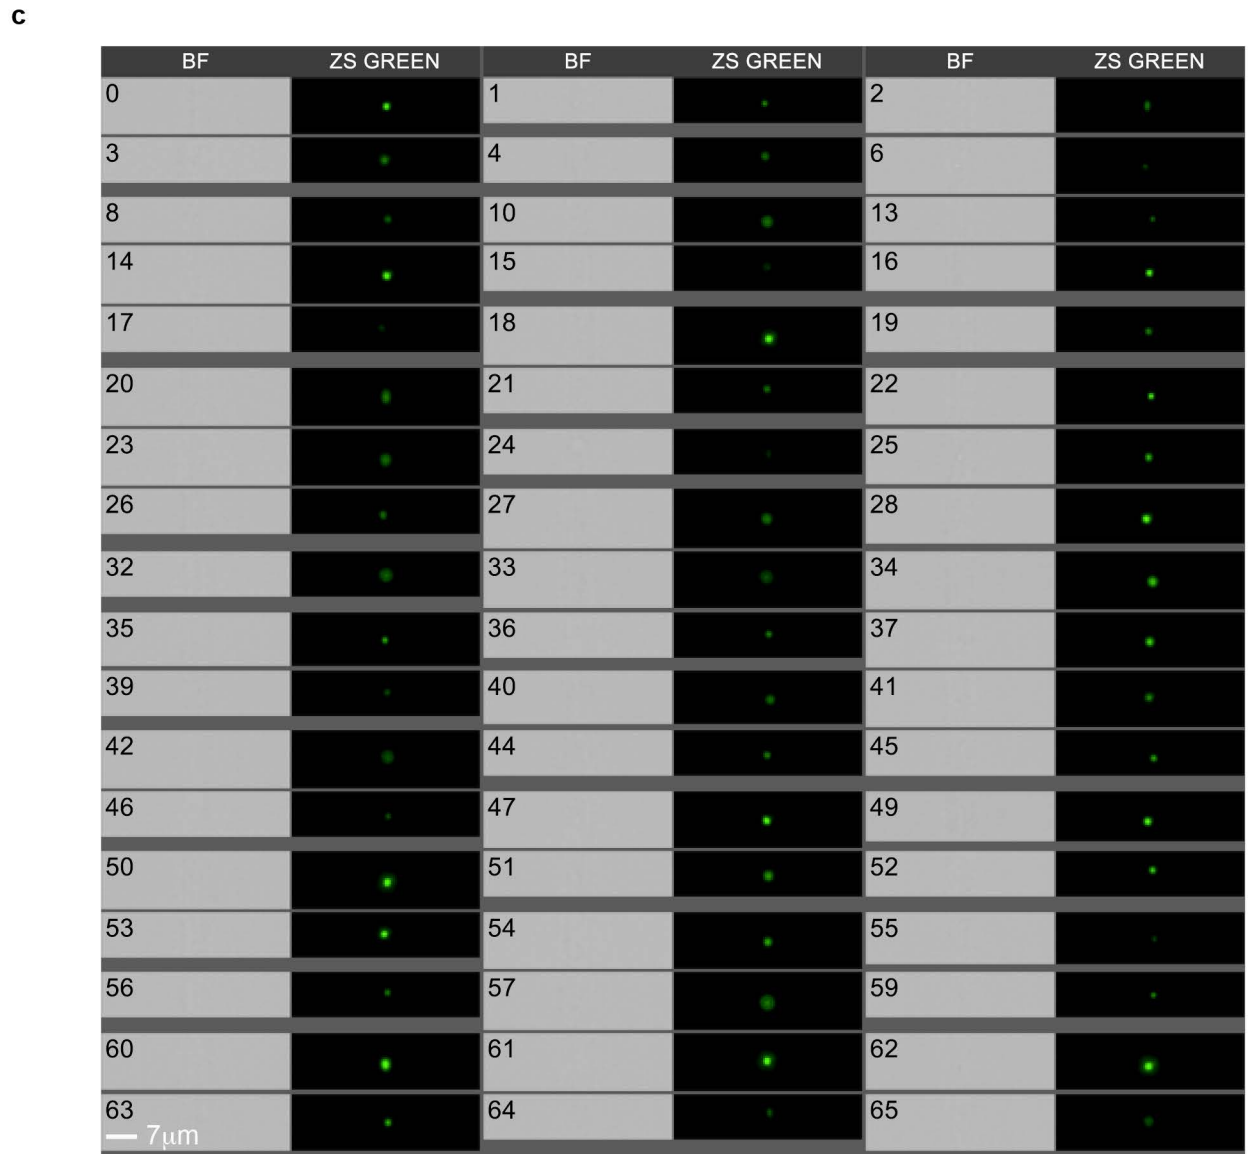

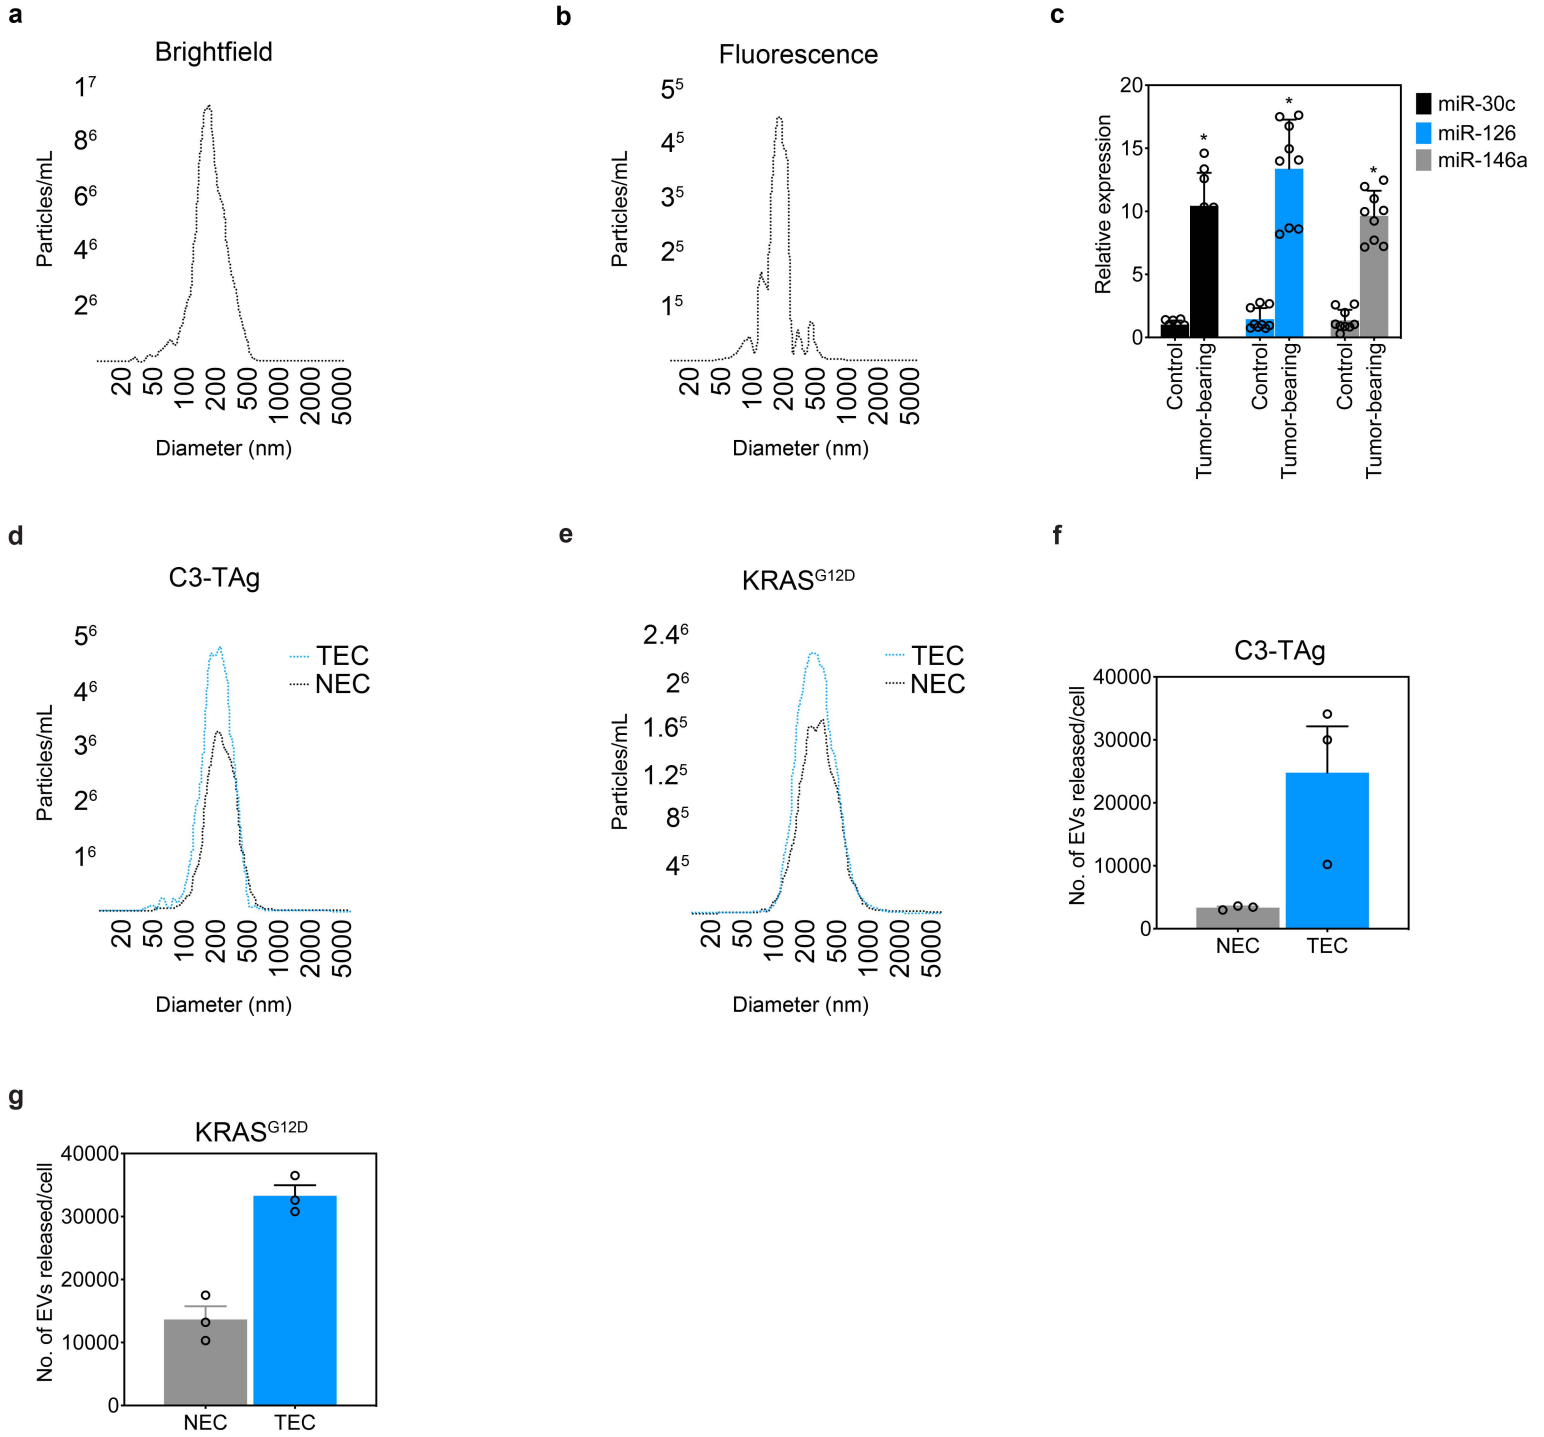

Supplement: 41598_2019_52466_MOESM2_ESM.pdf [file 41598_2019_52466_MOESM2_ESM.pdf]
